# Supplementary material for: The role of vibronic coupling in the electronic spectroscopy of maleimide: a multi-mode and multi-state quantum dynamics study
Source: Royal Society of Chemistry journal article supplement (doi:10.1039/d0cp04514d), 2020-01-01
Supplement: d0cp04514d1.pdf [file d0cp04514d1.pdf]

## Supporting Information

### The Role of Vibronic Coupling in Maleimide: A Multi-Mode and Multi-State Quantum Dynamics Study

Andreas Lehr,<sup>†</sup> Sandra Gómez,<sup>‡</sup> Michael A. Parkes,<sup>‡</sup> and Graham A. Worth\*,<sup>‡</sup>

<sup>†</sup> *Technical University of Darmstadt, Eduard-Zintl-Institut, Alarich-Weiss-Straße 8, 64287 Darmstadt, Germany*

<sup>‡</sup> *University College London, Department of Chemistry, 20 Gordon Street, London WC1H 0AJ, United Kingdom*

---

Here we provide additional extensive information on the model Hamiltonian described in the manuscript and used for simulating absorption spectra and population transfer dynamics.

The number of electronic states to be considered is justified by calculating higher-lying singlet and triplet excited states as shown in Tab. S1. The EOM-CCSD/cc-pVDZ level of theory is compared to the EOM-CCSD/aug-cc-pVTZ level of theory, which has been employed along with the SA(11)-CASPT2(12,9)/cc-pVDZ to demonstrate its applicability in the presented model Hamiltonian. ADC(3)/cc-pVDZ calculations, as another *ab initio* approach, are also listed for comparison. Fig. S1 shows the adiabatic potential energy surfaces along the normal modes  $\nu_1$  and  $\nu_{18}$ . It is stressed that the inclusion of triplet states becomes crucial when simulating emission spectra. Singlet excited states above 7 eV are found to be energetically well separated from the first two excitation bands studied and seem to be based on complicated coupling between many excited states close in energy.

Fig. S2 shows all 24 normal modes together with their symmetries and the short-hand notation for the most dominant vibrations based on calculations at the CCSD/aug-cc-pVTZ level of theory being consistent with CCSD/cc-pVDZ results. Fig. S3 gives an overview of the adiabatic potential energy surfaces of all normal modes for the first five electronic states at the EOM-CCSD/cc-pVDZ level of theory which have been fitted in order to derive the model Hamiltonian.

A full list of on-diagonal linear intra-state coupling constants  $\kappa_{\alpha}^{(i)}$ , off-diagonal linear inter-state coupling constants  $\lambda_{\alpha}^{(i,j)}$  as well as on-diagonal bilinear (quadratic) coupling constants  $\gamma_{\alpha,\beta}^{(i)}$  ( $\gamma_{\alpha,\alpha}^{(i)}$ ) can be found in Tab. S2, S3 and S4. Parameters concerning the diabatic quartic and Morse potential are displayed in Tab. S5 and S6. Furthermore, all parameters derived from this fitting procedure can also be seen from the MCTDH operator file showing the full structure of the Hamiltonian. The input file is given as well specifying the MCTDH parameters for the simulation of the second excitation band using the 6-mode model. Details on how to read this file can be found in the Quantics documentation.<sup>1,2</sup>

Based on this 6-mode model containing the most important normal modes of  $a_1$  symmetry, the suggested peak assignment for the experimental second excitation band is shown in Fig. S4.

**Table S1.** Experimental and *ab initio* vertical singlet and triplet excitation energies  $E$  and oscillator strength  $f$  for maleimide in  $C_{2v}$  symmetry. While the EOM-CCSD/cc-pVDZ level of theory is chosen for calculating the points on the adiabatic PESs in Fig. S1, the EOM-CCSD/aug-cc-pVTZ, ADC(3)/cc-pVDZ and SA(11)-CASPT2(12,9)/cc-pVDZ results are shown here for comparison. The first five electronic states,  $S_0 - S_4$  shown in bold letters, are considered in the presented model Hamiltonian.

| state                   | sym      | EOM-CCSD/<br>cc-pVDZ |       | EOM-CCSD/<br>aug-cc-pVTZ |       | ADC(3)/<br>cc-pVDZ |       | SA(11)-<br>CASPT2(12,9)/<br>cc-pVDZ |       | Experiment               |                            |                   |
|-------------------------|----------|----------------------|-------|--------------------------|-------|--------------------|-------|-------------------------------------|-------|--------------------------|----------------------------|-------------------|
|                         |          | $E$ / eV             | $f$   | $E$ / eV                 | $f$   | $E$ / eV           | $f$   | $E$ / eV                            | $f$   | $E$ / eV                 |                            |                   |
| <b><math>S_0</math></b> | $1^1A_1$ | 0.00                 |       | 0.00                     |       | 0.00               |       | 0.00                                |       |                          |                            |                   |
| <b><math>S_1</math></b> | $1^1B_1$ | 4.06                 | 0.000 | 4.14                     | 0.000 | 3.81               | 0.000 | 3.37                                | 0.001 | 3.33 <sup>b</sup>        |                            |                   |
| <b><math>S_2</math></b> | $1^1A_2$ | 4.84                 | –     | 4.90                     | –     | 4.44               | –     | 3.96                                | –     |                          |                            |                   |
| <b><math>S_3</math></b> | $1^1B_2$ | 5.22                 | 0.093 | 5.23                     | 0.027 | 4.70               | 0.045 | 4.62                                | 0.026 | 4.72 <sup>a</sup>        | 4.48 <sup>b</sup>          | 4.67 <sup>c</sup> |
| <b><math>S_4</math></b> | $2^1B_2$ | 6.68                 | 0.432 | 6.55                     | 0.450 | 6.11               | 0.503 | 5.80                                | 0.456 | $\sim 5.95$ <sup>a</sup> | $\sim 6.20$ <sup>b,c</sup> |                   |
| $S_5$                   | $1^1B_1$ | 8.11                 | 0.002 | 8.12                     | 0.003 | 6.39               | 0.004 |                                     |       |                          |                            |                   |
| $S_6$                   | $2^1A_2$ | 8.14                 | –     | 8.15                     | –     | 6.92               | –     | 6.96                                | –     |                          |                            |                   |
| $S_7$                   | $2^1A_1$ | 8.85                 | 0.034 | 8.93                     | 0.038 | 7.24               | 0.029 | 7.31                                | 0.016 |                          |                            |                   |
| $S_8$                   | $3^1B_1$ | 8.89                 | 0.006 | 8.84                     | 0.001 | 7.28               | 0.000 | 7.32                                | 0.000 |                          |                            |                   |
| $S_9$                   | $4^1B_1$ | 9.04                 | 0.001 | 8.89                     | 0.000 | 7.79               | 0.001 | 8.07                                | 0.000 |                          |                            |                   |
| $S_{10}$                | $3^1B_2$ | 9.23                 | 0.012 | 8.96                     | 0.019 | 7.71               | 0.028 |                                     |       |                          |                            |                   |
| $T_1$                   | $1^3B_2$ | 3.70                 | –     | 3.77                     | –     | 3.32               | –     |                                     |       |                          |                            |                   |
| $T_2$                   | $1^3B_1$ | 3.75                 | –     | 3.84                     | –     | 3.61               | –     |                                     |       |                          |                            |                   |
| $T_3$                   | $2^3B_2$ | 4.35                 | –     | 4.45                     | –     | 3.83               | –     |                                     |       |                          |                            |                   |
| $T_4$                   | $1^3A_2$ | 4.51                 | –     | 4.60                     | –     | 4.32               | –     |                                     |       |                          |                            |                   |
| $T_5$                   | $1^3A_1$ | 6.47                 | –     | 6.54                     | –     | 5.97               | –     |                                     |       |                          |                            |                   |

<sup>a</sup> our vapour phase results at 315 K

<sup>b</sup> Seliskar *et al.*: maleimide in EPA mixed solvent at 77 K<sup>3</sup>

<sup>c</sup> Seliskar *et al.*: maleimide in 3-methylpentane at 300 K<sup>3</sup>

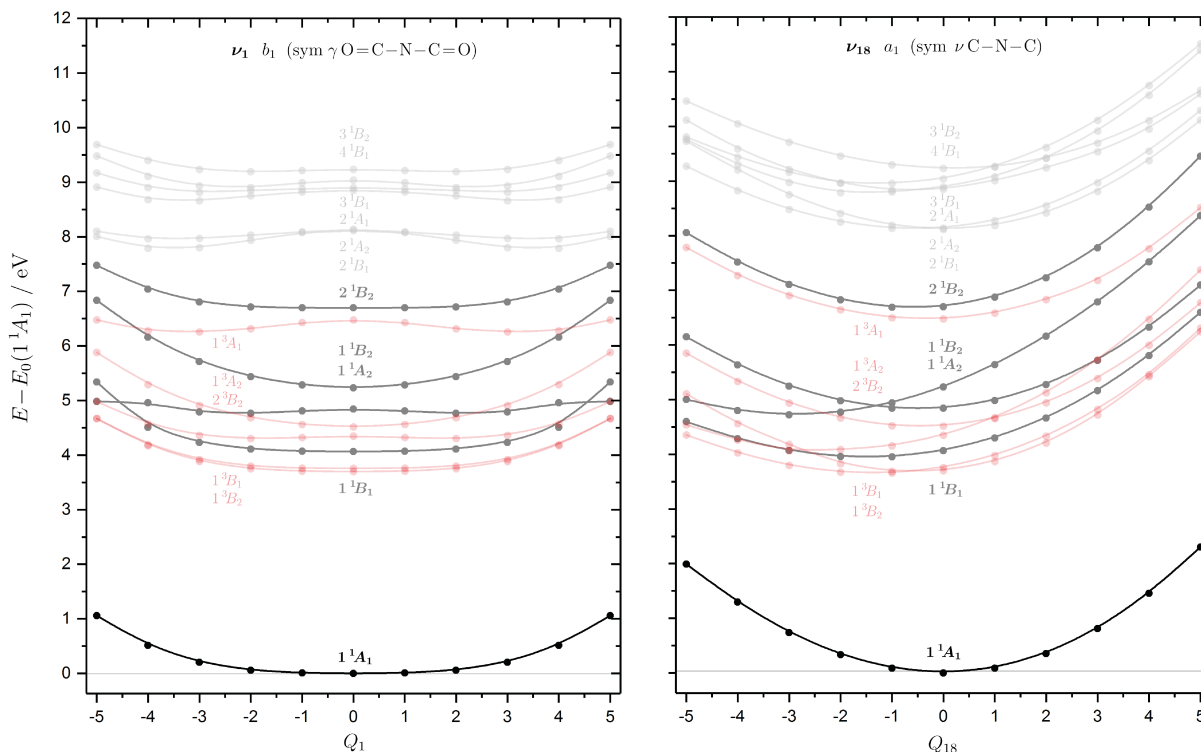

**Figure S1.** Adiabatic single-point energies  $E$  for a larger set of excited singlet and triplet states shown relative to the ground state energy at the FC point  $E_0(1^1A_1)$  as a function of mass- and frequency-scaled normal mode coordinates  $Q$  of mode  $\nu_1$  (left) and  $\nu_{18}$  (right). The EOM-CCSD/cc-pVDZ level of theory has been chosen for calculating a wider range of excited states. The symmetry labels refer to the FC point at  $C_{2v}$  symmetry. The dark grey states of symmetry  $1^1A_1$ ,  $1^1B_1$ ,  $1^1A_2$ ,  $1^1B_2$  and  $2^1B_2$  are treated explicitly, whereas states higher in energy (light grey) and triplet states (light red) are excluded in the presented model Hamiltonian.

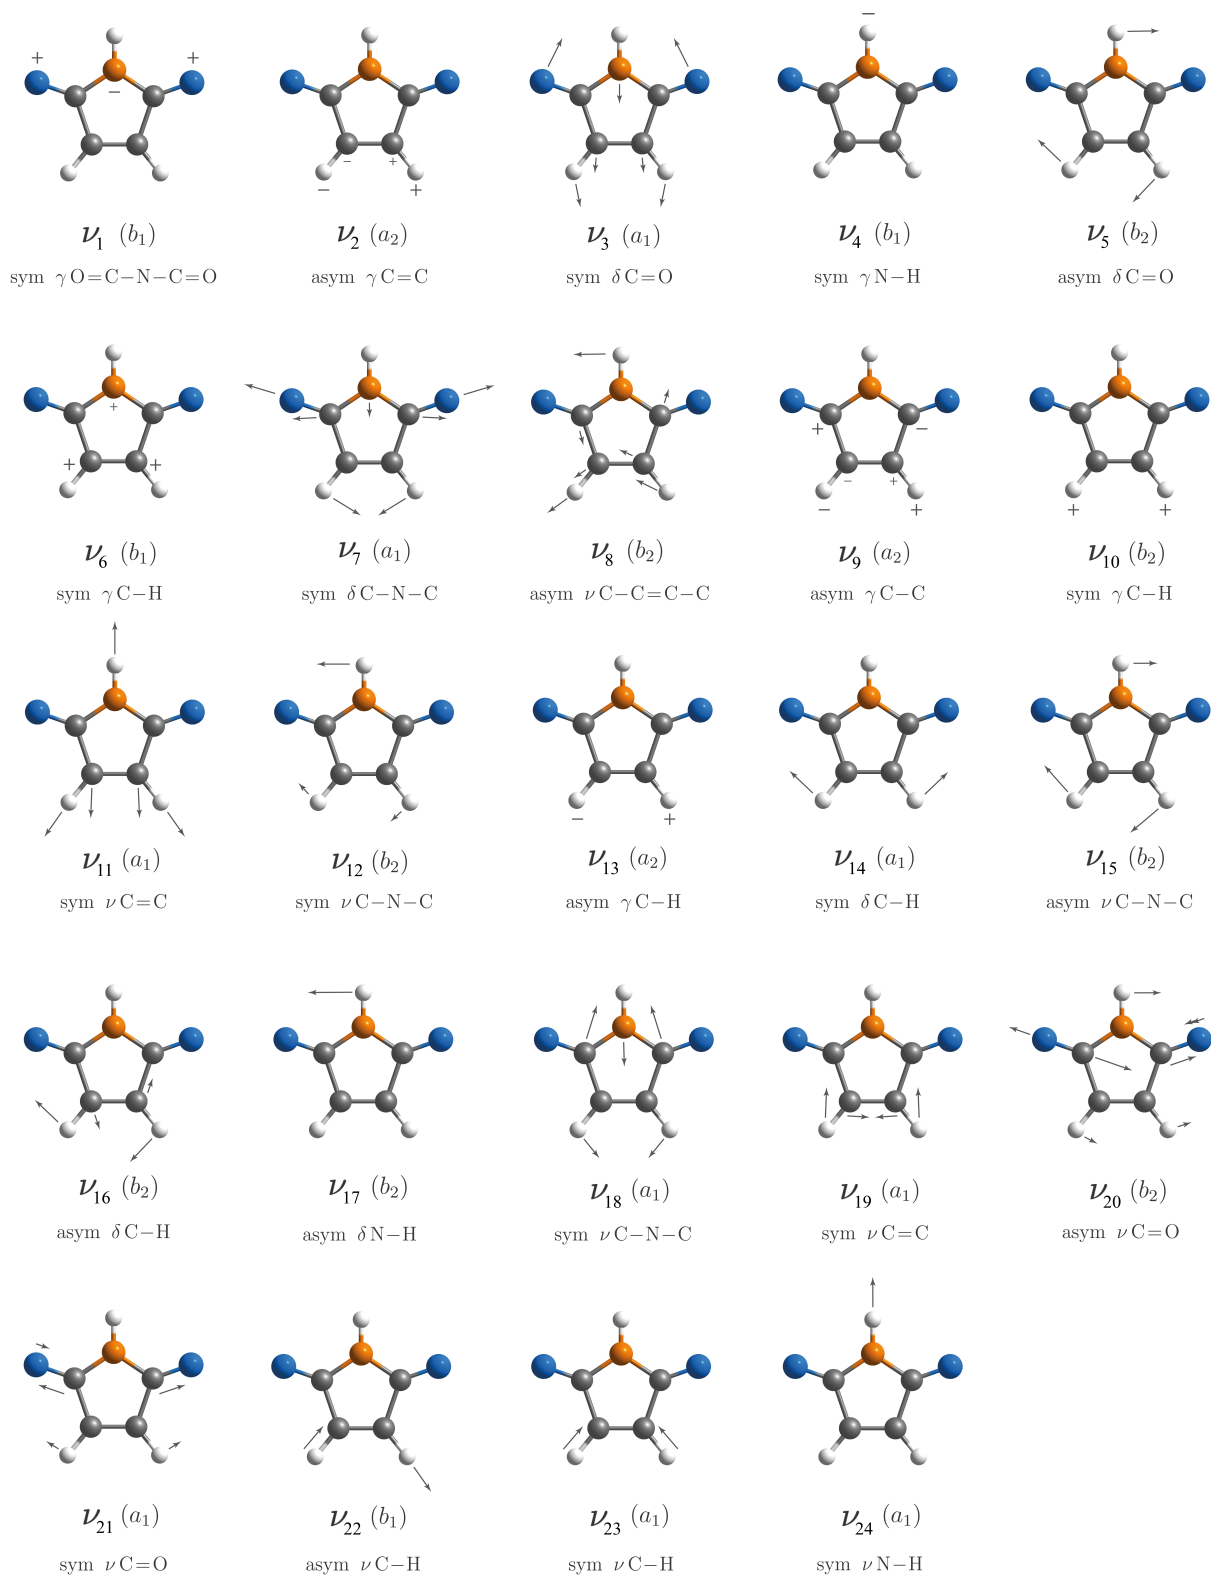

**Figure S2.** Overview of all normal modes  $\nu$ , together with their point group symmetries and description of the most dominant molecular group partaking in the corresponding vibration. The results are based on CCSD/aug-cc-pVTZ frequency analyses. It is distinguished between stretching ( $\nu$ ), bending ( $\delta$ ) and out-of-plane vibrations ( $\gamma$ ). The labels *sym* and *asym* define the retained and broken symmetry with respect to the  $\sigma_v$  mirror plane perpendicular to the molecular plane.

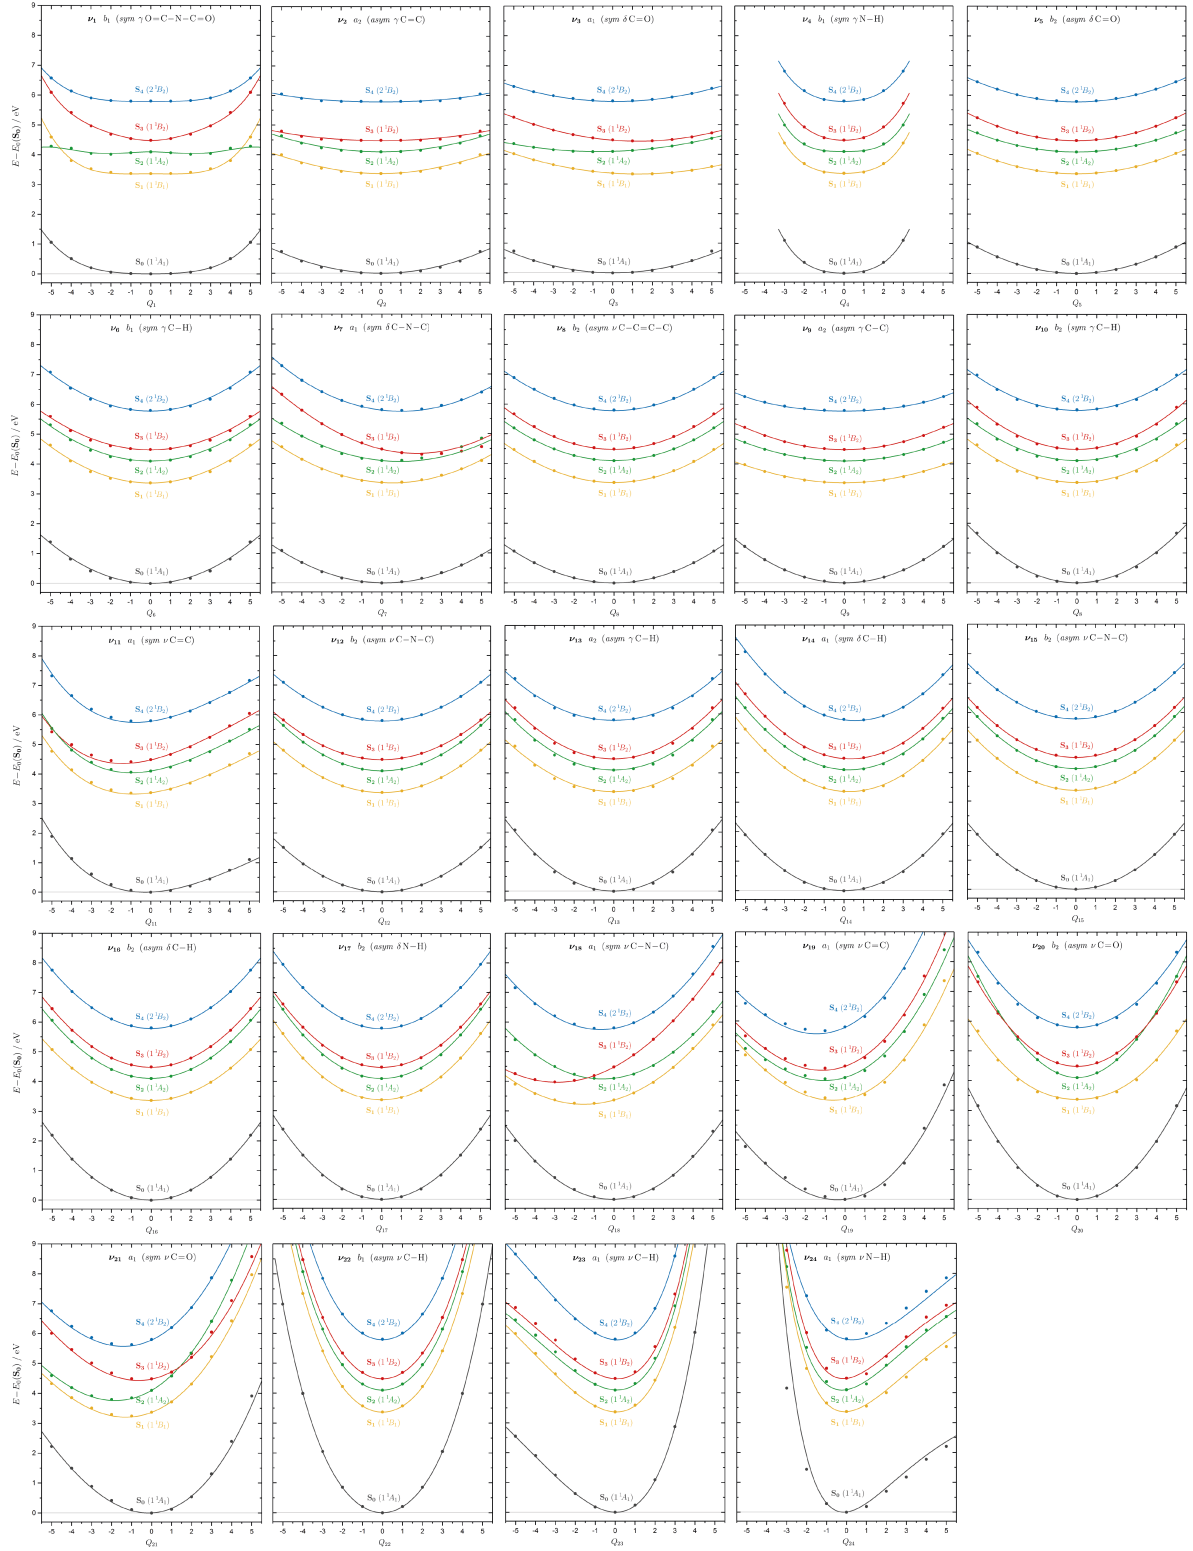

**Figure S3.** Adiabatic single-point energies  $E$  (dots) of maleimide calculated at the EOM-CCSD/cc-pVDZ level of theory for first five electronic states shown relative to the ground state energy at the FC point  $E_0(S_0)$  as a function of mass- and frequency-scaled normal mode coordinates  $Q$  of all normal modes  $\nu$ . The adiabatic potential energy curves (solid lines) are obtained from the fitted vibronic coupling model for that particular normal mode. Both the single-point energies as well as the fitted curves have been shifted to the SA(11)-CASPT2(12,9)/cc-pVDZ excitation energies. The ground state  $S_0$  is shown in black,  $S_1$  in yellow,  $S_2$  in green,  $S_3$  in red and  $S_4$  in blue with symmetry labels referring to maleimide in  $C_{2v}$  symmetry at the FC point.

**Table S2.** On-diagonal linear intra-state coupling constants  $\kappa_{\alpha}^{(i)}$  determined by fitting the adiabatic PESs for all vibrational modes. Corresponding frequencies  $\omega$  and single-point energies have been calculated at the (EOM-)CCSD/cc-pVDZ level of theory. The parameter highlighted in red has been altered to achieve a better correspondence with the experiment (cf. Tab. 5).

| mode       | $\omega / \text{eV}$ | $\kappa_{\alpha}^{(i)} / \text{eV}$ |        |        |               |
|------------|----------------------|-------------------------------------|--------|--------|---------------|
|            |                      | (1)                                 | (2)    | (3)    | (4)           |
| $\nu_3$    | 0.049                | -0.044                              | 0.020  | -0.054 | -0.006        |
| $\nu_7$    | 0.080                | -0.041                              | -0.065 | -0.158 | <b>-0.078</b> |
| $\nu_{11}$ | 0.114                | 0.069                               | 0.089  | 0.127  | 0.064         |
| $\nu_{14}$ | 0.133                | -0.038                              | -0.037 | -0.050 | -0.086        |
| $\nu_{18}$ | 0.172                | 0.187                               | 0.083  | 0.352  | 0.109         |
| $\nu_{19}$ | 0.206                | 0.049                               | 0.130  | 0.169  | 0.229         |
| $\nu_{21}$ | 0.237                | 0.229                               | 0.359  | 0.100  | 0.279         |
| $\nu_{23}$ | 0.408                | -0.012                              | -0.014 | -0.013 | -0.027        |
| $\nu_{24}$ | 0.458                | -0.006                              | 0.007  | -0.044 | -0.010        |

**Table S3.** Off-diagonal linear inter-state coupling constants  $\lambda_{\alpha}^{(i,j)}$  determined by fitting the adiabatic PESs for all vibrational modes. Corresponding frequencies  $\omega$  and single-point energies have been calculated at the (EOM-)CCSD/cc-pVDZ level of theory. The parameter highlighted in red has been altered to achieve a better correspondence with the experiment (cf. Tab. 5).

| mode       | $\omega / \text{eV}$ | $\lambda_{\alpha}^{(i,j)} / \text{eV}$ |        |        |        |        |        |        |        |        |               |
|------------|----------------------|----------------------------------------|--------|--------|--------|--------|--------|--------|--------|--------|---------------|
|            |                      | (0, 1)                                 | (0, 2) | (0, 3) | (0, 4) | (1, 2) | (1, 3) | (1, 4) | (2, 3) | (2, 4) | (3, 4)        |
| $\nu_1$    | 0.014                | -0.011                                 |        |        |        |        |        |        | -0.131 | -0.001 |               |
| $\nu_2$    | 0.036                |                                        | -0.011 |        |        |        | 0.055  | -0.121 |        |        |               |
| $\nu_3$    | 0.049                |                                        |        |        |        |        |        |        |        |        | <b>-0.061</b> |
| $\nu_4$    | 0.062                | 0.039                                  |        |        |        |        |        |        | 0.090  | -0.076 |               |
| $\nu_5$    | 0.067                |                                        |        | 0.001  | -0.005 | 0.023  |        |        |        |        |               |
| $\nu_6$    | 0.079                | -0.023                                 |        |        |        |        |        |        | 0.005  | 0.035  |               |
| $\nu_7$    | 0.080                |                                        |        |        |        |        |        |        |        |        | -0.089        |
| $\nu_8$    | 0.084                |                                        |        | -0.011 | 0.017  | 0.028  |        |        |        |        |               |
| $\nu_9$    | 0.097                |                                        | 0.012  |        |        |        | 0.110  | 0.138  |        |        |               |
| $\nu_{10}$ | 0.105                | -0.037                                 |        |        |        |        |        |        | -0.010 | -0.075 |               |
| $\nu_{11}$ | 0.114                |                                        |        |        |        |        |        |        |        |        | 0.048         |
| $\nu_{12}$ | 0.115                |                                        |        | -0.009 | 0.012  | 0.005  |        |        |        |        |               |
| $\nu_{13}$ | 0.119                |                                        | -0.034 |        |        |        | 0.040  | 0.164  |        |        |               |
| $\nu_{14}$ | 0.133                |                                        |        |        |        |        |        |        |        |        | -0.002        |
| $\nu_{15}$ | 0.145                |                                        |        | 0.013  | 0.003  | 0.042  |        |        |        |        |               |
| $\nu_{16}$ | 0.167                |                                        |        | -0.019 | -0.006 | -0.036 |        |        |        |        |               |
| $\nu_{17}$ | 0.170                |                                        |        | 0.008  | 0.001  | 0.035  |        |        |        |        |               |
| $\nu_{18}$ | 0.172                |                                        |        |        |        |        |        |        |        |        | 0.071         |
| $\nu_{19}$ | 0.206                |                                        |        |        |        |        |        |        |        |        | -0.028        |
| $\nu_{20}$ | 0.232                |                                        |        | 0.047  | -0.109 | -0.172 |        |        |        |        |               |
| $\nu_{21}$ | 0.237                |                                        |        |        |        |        |        |        |        |        | -0.029        |
| $\nu_{22}$ | 0.405                |                                        |        | -0.002 | 0.001  | -0.013 |        |        |        |        |               |
| $\nu_{23}$ | 0.408                |                                        |        |        |        |        |        |        |        |        | 0.010         |
| $\nu_{24}$ | 0.458                |                                        |        |        |        |        |        |        |        |        | -0.087        |

**Table S4.** On-diagonal quadratic (top) and bilinear (bottom) intra-state coupling constants  $\gamma_{\alpha,\alpha}^{(i)}$  and  $\gamma_{\alpha,\beta}^{(i)}$  determined by fitting the adiabatic PESs for all vibrational modes. Corresponding frequencies and single-point energies have been calculated at the (EOM-)CCSD/cc-pVDZ level of theory. The parameter highlighted in red has been altered to achieve a better correspondence with the experiment (cf. Tab. 5).

| modes                        | $\gamma_{\alpha,\alpha}^{(i)} / \text{eV}$ |        |        |        | modes                        | $\gamma_{\alpha,\alpha}^{(i)} / \text{eV}$ |        |        |        |
|------------------------------|--------------------------------------------|--------|--------|--------|------------------------------|--------------------------------------------|--------|--------|--------|
|                              | (1)                                        | (2)    | (3)    | (4)    |                              | (1)                                        | (2)    | (3)    | (4)    |
| $\nu_1, \nu_1^\dagger$       | 0.004                                      | -0.055 | 0.110  | -0.001 | $\nu_{13}, \nu_{13}$         | 0.025                                      | 0.012  | 0.013  | -0.034 |
| $\nu_2, \nu_2$               | 0.033                                      | 0.004  | -0.020 | -0.032 | $\nu_{14}, \nu_{14}$         | 0.020                                      | 0.018  | 0.021  | 0.022  |
| $\nu_3, \nu_3$               | -0.014                                     | -0.022 | -0.003 | -0.017 | $\nu_{15}, \nu_{15}$         | -0.005                                     | -0.009 | -0.010 | -0.019 |
| $\nu_4, \nu_4^\dagger$       | 0.042                                      | 0.030  | 0.089  | 0.065  | $\nu_{16}, \nu_{16}$         | -0.028                                     | -0.015 | -0.010 | -0.009 |
| $\nu_5, \nu_5$               | -0.011                                     | -0.018 | -0.005 | -0.013 | $\nu_{17}, \nu_{17}$         | 0.013                                      | 0.013  | 0.001  | 0.004  |
| $\nu_6, \nu_6$               | 0.019                                      | 0.016  | 0.007  | 0.020  | $\nu_{18}, \nu_{18}$         | -0.049                                     | -0.030 | -0.046 | -0.014 |
| $\nu_7, \nu_7$               | -0.002                                     | -0.010 | 0.020  | -0.008 | $\nu_{19}, \nu_{19}^\dagger$ | -0.010                                     | -0.022 | -0.010 | -0.007 |
| $\nu_8, \nu_8$               | 0.005                                      | 0.001  | 0.009  | 0.004  | $\nu_{20}, \nu_{20}$         | -0.016                                     | 0.004  | -0.008 | -0.040 |
| $\nu_9, \nu_9$               | -0.010                                     | -0.047 | -0.055 | -0.079 | $\nu_{21}, \nu_{21}^\dagger$ | -0.049                                     | -0.041 | -0.035 | -0.036 |
| $\nu_{10}, \nu_{10}$         | -0.009                                     | -0.004 | 0.004  | -0.021 | $\nu_{22}, \nu_{22}^\dagger$ | -0.009                                     | -0.014 | -0.004 | 0.000  |
| $\nu_{11}, \nu_{11}^\dagger$ | 0.008                                      | 0.017  | 0.022  | 0.013  | $\nu_{23}, \nu_{23}^\dagger$ | 0.006                                      | -0.018 | -0.017 | 0.031  |
| $\nu_{12}, \nu_{12}$         | -0.002                                     | 0.007  | -0.009 | 0.011  | $\nu_{24}, \nu_{24}^\dagger$ | 0.079                                      | 0.081  | 0.109  | -0.112 |
| modes                        | $\gamma_{\alpha,\beta}^{(i)} / \text{eV}$  |        |        |        | modes                        | $\gamma_{\alpha,\beta}^{(i)} / \text{eV}$  |        |        |        |
|                              | (1)                                        | (2)    | (3)    | (4)    |                              | (1)                                        | (2)    | (3)    | (4)    |
| $\nu_3, \nu_{23}$            | -0.001                                     | 0.000  | 0.000  | -0.001 | $\nu_{19}, \nu_{24}$         | -0.002                                     | -0.002 | -0.002 | 0.002  |
| $\nu_3, \nu_{24}$            | -0.001                                     | 0.002  | 0.002  | 0.002  | $\nu_{21}, \nu_{23}$         | -0.001                                     | -0.001 | -0.001 | -0.001 |
| $\nu_7, \nu_{24}$            | 0.001                                      | 0.001  | 0.001  | 0.001  | $\nu_{21}, \nu_{24}$         | 0.000                                      | 0.001  | 0.001  | 0.001  |
| $\nu_{18}, \nu_{23}$         | 0.001                                      | 0.001  | 0.001  | 0.001  | $\nu_{23}, \nu_{24}$         | 0.003                                      | 0.003  | 0.003  | 0.003  |
| $\nu_{18}, \nu_{24}$         | -0.001                                     | -0.001 | -0.001 | -0.001 |                              |                                            |        |        |        |

<sup>†</sup> Corresponding parameters are replaced by higher order diabatic and Morse potentials (cf. Tab. S5 and S6).

**Table S5.** Diabatic quartic potential parameters  $\gamma_\alpha^{(i)}$  and  $\epsilon_\alpha^{(i)}$  determined by fitting the adiabatic PESs for the vibrational modes  $\nu_1$ ,  $\nu_4$  and  $\nu_{22}$ . Corresponding frequencies and single-point energies have been calculated at the (EOM-)CCSD/cc-pVDZ level of theory.

| modes      |                         | Parameters / eV |        |        |        |        |
|------------|-------------------------|-----------------|--------|--------|--------|--------|
|            |                         | (0)             | (1)    | (2)    | (3)    | (4)    |
| $\nu_1$    | $\gamma_\alpha^{(i)}$   | 0.009           | 0.004  | 0.003  | 0.027  | -0.006 |
|            | $\epsilon_\alpha^{(i)}$ | 0.030           | 0.027  | 0.026  | 0.028  | 0.026  |
| $\nu_4$    | $\gamma_\alpha^{(i)}$   | 0.064           | 0.042  | 0.030  | 0.089  | 0.065  |
|            | $\epsilon_\alpha^{(i)}$ | 0.160           | 0.163  | 0.194  | 0.122  | 0.129  |
| $\nu_{22}$ | $\gamma_\alpha^{(i)}$   | -0.011          | -0.009 | -0.014 | -0.004 | 0.000  |
|            | $\epsilon_\alpha^{(i)}$ | 0.079           | 0.078  | 0.079  | 0.076  | 0.074  |

**Table S6.** Morse potential parameters  $D_\alpha^{(i)}$ ,  $\alpha_\alpha^{(i)}$  and  $Q_{0,\alpha}^{(i)}$  determined by fitting the adiabatic PESs for the vibrational modes  $\nu_{11}$ ,  $\nu_{19}$ ,  $\nu_{21}$ ,  $\nu_{23}$  and  $\nu_{24}$ . Corresponding frequencies and single-point energies have been calculated at the (EOM-)CCSD/cc-pVDZ level of theory.

| modes      |                       | Parameters |        |        |        |        |
|------------|-----------------------|------------|--------|--------|--------|--------|
|            |                       | (0)        | (1)    | (2)    | (3)    | (4)    |
| $\nu_{11}$ | $D_\alpha^{(i)}$ / eV | 7.490      | 8.013  | 8.471  | 9.422  | 8.611  |
|            | $\alpha_\alpha^{(i)}$ | 0.087      | 0.088  | 0.088  | 0.085  | 0.086  |
|            | $Q_{0,\alpha}^{(i)}$  | -0.274     | -0.880 | -0.982 | -1.393 | -0.808 |
| $\nu_{19}$ | $D_\alpha^{(i)}$ / eV | 98.999     | 98.999 | 98.998 | 98.998 | 98.997 |
|            | $\alpha_\alpha^{(i)}$ | -0.032     | -0.032 | -0.030 | -0.031 | -0.031 |
|            | $Q_{0,\alpha}^{(i)}$  | -0.374     | -0.603 | -1.035 | -1.144 | -1.439 |
| $\nu_{21}$ | $D_\alpha^{(i)}$ / eV | 98.999     | 98.998 | 98.997 | 99.000 | 98.998 |
|            | $\alpha_\alpha^{(i)}$ | -0.034     | -0.030 | -0.031 | -0.031 | -0.031 |
|            | $Q_{0,\alpha}^{(i)}$  | -0.150     | -1.283 | -1.819 | -0.653 | -1.430 |
| $\nu_{23}$ | $D_\alpha^{(i)}$ / eV | 8.847      | 8.927  | 7.017  | 7.017  | 10.631 |
|            | $\alpha_\alpha^{(i)}$ | -0.152     | -0.152 | -0.166 | -0.166 | -0.144 |
|            | $Q_{0,\alpha}^{(i)}$  | 0.040      | 0.069  | 0.090  | 0.090  | 0.099  |
| $\nu_{24}$ | $D_\alpha^{(i)}$ / eV | 4.098      | 4.894  | 4.937  | 5.390  | 4.959  |
|            | $\alpha_\alpha^{(i)}$ | 0.277      | 0.232  | 0.233  | 0.229  | 0.186  |
|            | $Q_{0,\alpha}^{(i)}$  | -0.534     | -0.089 | -0.231 | -0.152 | 0.294  |

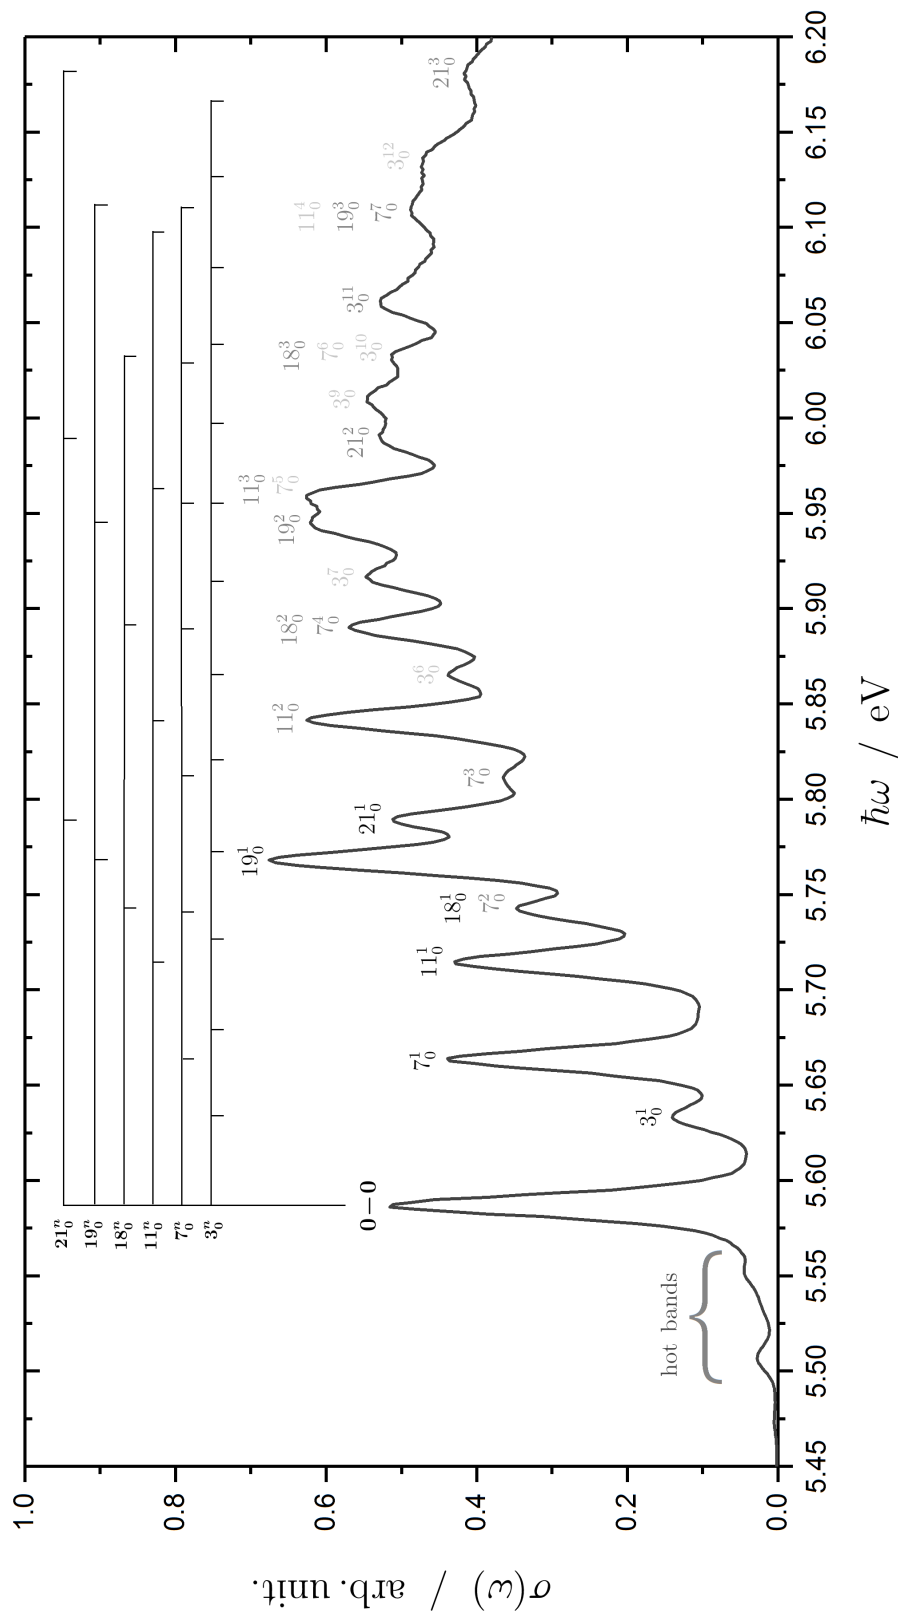

**Figure S4.** Experimental absorption spectra for the second excitation band of maleimide represented by the absorption cross section  $\sigma$  as a function of the photon energy  $\hbar\omega$ . The spectrum is shown for our vapour phase result at 315 K. A suggestion for the peak assignment of the most important vibronic excitations is given based on investigating the simulation results by employing the 6-mode model. The notation reads the  $a_1$  vibrational mode followed by the excitation from the electronic and vibrational ground state (subscript) to the excited vibrational state of the  $2^1B_2$  electronic state (superscript). All peaks are assigned relative to the 0-0 transition.



```

1 #-----
2 # Maleimide VCHam
3 #-----
4
5 RUN-SECTION
6     name = fromS3
7     propagate
8     tfinal = 200 tout=0.5 tpsi=5.0
9     output gridpop=el psi auto=twice
10 END-RUN-SECTION
11
12 OPERATOR-SECTION
13     opname = maleimide
14 END-OPERATOR-SECTION
15
16 SPF-BASIS-SECTION
17     multi-set
18     v7,v18 = 2,2,35,32,5
19     v1,v11 = 2,2,35,32,5
20     v4,v19 = 2,2,18,18,4
21 END-SPF-BASIS-SECTION
22
23 PRIMITIVE-BASIS-SECTION
24     el      el      5
25     v1      HO      16      0.00      1.00      1.00
26     v2      HO      11      0.00      1.00      1.00
27     v3      HO      21      0.00      1.00      1.00
28     v4      HO      16      0.00      1.00      1.00
29     v5      HO      11      0.00      1.00      1.00
30     v6      HO      11      0.00      1.00      1.00
31     v7      HO      21      0.00      1.00      1.00
32     v8      HO      11      0.00      1.00      1.00
33     v9      HO      21      0.00      1.00      1.00
34     v10     HO      10      0.00      1.00      1.00
35     v11     HO      16      0.00      1.00      1.00
36     v12     HO      11      0.00      1.00      1.00
37     v13     HO      11      0.00      1.00      1.00
38     v14     HO      11      0.00      1.00      1.00
39     v15     HO      11      0.00      1.00      1.00
40     v16     HO      11      0.00      1.00      1.00
41     v17     HO      11      0.00      1.00      1.00
42     v18     HO      31      0.00      1.00      1.00
43     v19     HO      16      0.00      1.00      1.00
44     v20     HO      11      0.00      1.00      1.00
45     v21     HO      16      0.00      1.00      1.00
46     v22     HO      11      0.00      1.00      1.00
47     v23     HO      11      0.00      1.00      1.00
48     v24     HO      11      0.00      1.00      1.00
49 end-primitive-basis-section
50
51 INIT_WF-SECTION
52     build
53     init_state = 4
54     v1      HO      0.00      0.00      1.00      1.00
55     v2      HO      0.00      0.00      1.00      1.00
56     v3      HO      0.00      0.00      1.00      1.00
57     v4      HO      0.00      0.00      1.00      1.00
58     v5      HO      0.00      0.00      1.00      1.00
59     v6      HO      0.00      0.00      1.00      1.00
60     v7      HO      0.00      0.00      1.00      1.00

```

```
61      v8      HO      0.00  0.00      1.00  1.00
62      v9      HO      0.00  0.00      1.00  1.00
63      v10     HO      0.00  0.00      1.00  1.00
64      v11     HO      0.00  0.00      1.00  1.00
65      v12     HO      0.00  0.00      1.00  1.00
66      v13     HO      0.00  0.00      1.00  1.00
67      v14     HO      0.00  0.00      1.00  1.00
68      v15     HO      0.00  0.00      1.00  1.00
69      v16     HO      0.00  0.00      1.00  1.00
70      v17     HO      0.00  0.00      1.00  1.00
71      v18     HO      0.00  0.00      1.00  1.00
72      v19     HO      0.00  0.00      1.00  1.00
73      v20     HO      0.00  0.00      1.00  1.00
74      v21     HO      0.00  0.00      1.00  1.00
75      v22     HO      0.00  0.00      1.00  1.00
76      v23     HO      0.00  0.00      1.00  1.00
77      v24     HO      0.00  0.00      1.00  1.00
78      end-build
79      END-INIT_WF-SECTION
80
81      END-INPUT
```

```

1  OP_DEFINE-SECTION
2  TITLE
3  Maleimide VCHam model.
4  Energies SA(11)-CASPT2(12,9)/cc-pVDZ  Other parameters  EOM-CCSD/cc-pVDZ.
5  END-TITLE
6  END-OP_DEFINE-SECTION
7
8  PARAMETER-SECTION
9
10 #Frequencies
11
12  omega_1      =  0.01401  ,  ev
13  omega_2      =  0.03583  ,  ev
14  omega_3      =  0.04917  ,  ev
15  omega_4      =  0.06180  ,  ev
16  omega_5      =  0.06709  ,  ev
17  omega_6      =  0.07921  ,  ev
18  omega_7      =  0.07960  ,  ev
19  omega_8      =  0.08424  ,  ev
20  omega_9      =  0.09654  ,  ev
21  omega_10     =  0.10525  ,  ev
22  omega_11     =  0.11441  ,  ev
23  omega_12     =  0.11549  ,  ev
24  omega_13     =  0.11886  ,  ev
25  omega_14     =  0.13270  ,  ev
26  omega_15     =  0.14491  ,  ev
27  omega_16     =  0.16680  ,  ev
28  omega_17     =  0.16951  ,  ev
29  omega_18     =  0.17204  ,  ev
30  omega_19     =  0.20630  ,  ev
31  omega_20     =  0.23199  ,  ev
32  omega_21     =  0.23661  ,  ev
33  omega_22     =  0.40491  ,  ev
34  omega_23     =  0.40773  ,  ev
35  omega_24     =  0.45788  ,  ev
36
37 #Energies
38
39  E1           =  0.00000  ,  ev
40  E2           =  3.37000  ,  ev
41  E3           =  3.96000  ,  ev
42  E4           =  4.62000  ,  ev
43  E5           =  5.80000  ,  ev
44
45 #On-Diagonal Linear Coupling Constants (Kappa)
46
47  kappa2_3     = -0.04397  ,  ev
48  kappa2_7     = -0.04125  ,  ev
49  kappa2_11    =  0.06880  ,  ev
50  kappa2_14    = -0.03806  ,  ev
51  kappa2_18    =  0.18713  ,  ev
52  kappa2_19    =  0.04920  ,  ev
53  kappa2_21    =  0.22930  ,  ev
54  kappa2_23    = -0.01190  ,  ev
55  kappa2_24    = -0.00570  ,  ev
56  kappa3_3     =  0.02012  ,  ev
57  kappa3_7     = -0.06468  ,  ev
58  kappa3_11    =  0.08920  ,  ev
59  kappa3_14    = -0.03719  ,  ev
60  kappa3_18    =  0.08324  ,  ev

```

61 kappa3\_19 = 0.13040 , ev  
62 kappa3\_21 = 0.35950 , ev  
63 kappa3\_23 = -0.01350 , ev  
64 kappa3\_24 = 0.00720 , ev  
65 kappa4\_3 = -0.05391 , ev  
66 kappa4\_7 = -0.15750 , ev  
67 kappa4\_11 = 0.12700 , ev  
68 kappa4\_14 = -0.05000 , ev  
69 kappa4\_18 = 0.35229 , ev  
70 kappa4\_19 = 0.16880 , ev  
71 kappa4\_21 = 0.10010 , ev  
72 kappa4\_23 = -0.01330 , ev  
73 kappa4\_24 = -0.04360 , ev  
74 kappa5\_3 = -0.00597 , ev  
75 kappa5\_7 = -0.10000 , ev  
76 kappa5\_11 = 0.06450 , ev  
77 kappa5\_14 = -0.08558 , ev  
78 kappa5\_18 = 0.10946 , ev  
79 kappa5\_19 = 0.22870 , ev  
80 kappa5\_21 = 0.27890 , ev  
81 kappa5\_23 = -0.02710 , ev  
82 kappa5\_24 = -0.01010 , ev

83

84 *#Off-Diagonal Linear Coupling Constants (Lambda)*

85

86 lambda1\_2\_1 = -0.01111 , ev  
87 lambda1\_2\_4 = 0.03901 , ev  
88 lambda1\_2\_6 = -0.02279 , ev  
89 lambda1\_2\_10 = -0.03680 , ev  
90 lambda1\_3\_2 = -0.01111 , ev  
91 lambda1\_3\_4 = -0.13100 , ev  
92 lambda1\_3\_9 = 0.01203 , ev  
93 lambda1\_3\_13 = -0.03389 , ev  
94 lambda1\_4\_5 = 0.00080 , ev  
95 lambda1\_4\_8 = -0.01106 , ev  
96 lambda1\_4\_12 = -0.00873 , ev  
97 lambda1\_4\_15 = 0.01329 , ev  
98 lambda1\_4\_16 = -0.01881 , ev  
99 lambda1\_4\_17 = 0.00791 , ev  
100 lambda1\_4\_20 = 0.04713 , ev  
101 lambda1\_4\_22 = -0.00181 , ev  
102 lambda1\_5\_5 = -0.00520 , ev  
103 lambda1\_5\_8 = 0.01673 , ev  
104 lambda1\_5\_12 = 0.01221 , ev  
105 lambda1\_5\_15 = 0.00287 , ev  
106 lambda1\_5\_16 = -0.00610 , ev  
107 lambda1\_5\_17 = 0.00119 , ev  
108 lambda1\_5\_20 = -0.10908 , ev  
109 lambda1\_5\_22 = 0.00131 , ev  
110 lambda2\_3\_5 = 0.02252 , ev  
111 lambda2\_3\_8 = 0.02779 , ev  
112 lambda2\_3\_12 = 0.00515 , ev  
113 lambda2\_3\_15 = 0.04166 , ev  
114 lambda2\_3\_16 = -0.03613 , ev  
115 lambda2\_3\_17 = 0.03490 , ev  
116 lambda2\_3\_20 = -0.17187 , ev  
117 lambda2\_3\_22 = -0.01259 , ev  
118 lambda2\_4\_2 = 0.05457 , ev  
119 lambda2\_4\_9 = 0.11012 , ev  
120 lambda2\_4\_13 = 0.04018 , ev

```

121 lambda2_5_2 = -0.12086 , ev
122 lambda2_5_9 = 0.13761 , ev
123 lambda2_5_13 = 0.16415 , ev
124 lambda3_4_4 = 0.08981 , ev
125 lambda3_4_6 = 0.00490 , ev
126 lambda3_4_10 = -0.00962 , ev
127 lambda3_5_1 = -0.00051 , ev
128 lambda3_5_4 = -0.07613 , ev
129 lambda3_5_6 = 0.03467 , ev
130 lambda3_5_10 = -0.07513 , ev
131 lambda4_5_3 = -0.10000 , ev
132 lambda4_5_7 = -0.08929 , ev
133 lambda4_5_11 = 0.04827 , ev
134 lambda4_5_14 = -0.00241 , ev
135 lambda4_5_18 = 0.07127 , ev
136 lambda4_5_19 = -0.02844 , ev
137 lambda4_5_21 = -0.02934 , ev
138 lambda4_5_23 = 0.00950 , ev
139 lambda4_5_24 = -0.08733 , ev

```

140

141 *#On-Diagonal Bilinear Coupling Constants (Gamma)*

142

```

143 gamma2_2_2 = 0.03292 , ev
144 gamma2_3_3 = -0.01433 , ev
145 gamma2_3_23 = -0.00050 , ev
146 gamma2_3_24 = 0.00140 , ev
147 gamma2_5_5 = -0.01096 , ev
148 gamma2_6_6 = 0.01850 , ev
149 gamma2_7_7 = -0.00239 , ev
150 gamma2_7_23 = -0.00020 , ev
151 gamma2_7_24 = 0.00050 , ev
152 gamma2_8_8 = 0.00472 , ev
153 gamma2_9_9 = -0.00979 , ev
154 gamma2_10_10 = -0.00934 , ev
155 gamma2_12_12 = -0.00175 , ev
156 gamma2_13_13 = 0.02519 , ev
157 gamma2_14_14 = 0.02017 , ev
158 gamma2_15_15 = -0.00516 , ev
159 gamma2_16_16 = -0.02775 , ev
160 gamma2_17_17 = 0.01250 , ev
161 gamma2_18_18 = -0.04933 , ev
162 gamma2_18_19 = -0.00010 , ev
163 gamma2_18_23 = 0.00050 , ev
164 gamma2_18_24 = -0.00080 , ev
165 gamma2_19_23 = -0.00010 , ev
166 gamma2_19_24 = -0.00180 , ev
167 gamma2_20_20 = -0.01565 , ev
168 gamma2_21_23 = -0.00090 , ev
169 gamma2_21_24 = 0.00040 , ev
170 gamma2_23_23 = 0.12380 , ev
171 gamma2_23_24 = 0.00250 , ev
172 gamma2_24_24 = 0.37860 , ev
173 gamma3_2_2 = 0.00366 , ev
174 gamma3_3_3 = -0.02179 , ev
175 gamma3_3_23 = -0.00050 , ev
176 gamma3_3_24 = 0.00150 , ev
177 gamma3_5_5 = -0.01828 , ev
178 gamma3_6_6 = 0.01583 , ev
179 gamma3_7_7 = -0.00976 , ev
180 gamma3_7_23 = -0.00020 , ev

```

|     |              |   |          |      |
|-----|--------------|---|----------|------|
| 181 | gamma3_7_24  | = | 0.00050  | , ev |
| 182 | gamma3_8_8   | = | 0.00058  | , ev |
| 183 | gamma3_9_9   | = | -0.04715 | , ev |
| 184 | gamma3_10_10 | = | -0.00375 | , ev |
| 185 | gamma3_12_12 | = | 0.00657  | , ev |
| 186 | gamma3_13_13 | = | 0.01187  | , ev |
| 187 | gamma3_14_14 | = | 0.01815  | , ev |
| 188 | gamma3_15_15 | = | -0.00938 | , ev |
| 189 | gamma3_16_16 | = | -0.01457 | , ev |
| 190 | gamma3_17_17 | = | 0.01265  | , ev |
| 191 | gamma3_18_18 | = | -0.03003 | , ev |
| 192 | gamma3_18_23 | = | 0.00050  | , ev |
| 193 | gamma3_18_24 | = | -0.00080 | , ev |
| 194 | gamma3_19_24 | = | -0.00180 | , ev |
| 195 | gamma3_20_20 | = | 0.00397  | , ev |
| 196 | gamma3_21_23 | = | -0.00090 | , ev |
| 197 | gamma3_21_24 | = | 0.00060  | , ev |
| 198 | gamma3_23_23 | = | 0.14090  | , ev |
| 199 | gamma3_23_24 | = | 0.00250  | , ev |
| 200 | gamma3_24_24 | = | 0.37960  | , ev |
| 201 | gamma4_1_4   | = | -0.00010 | , ev |
| 202 | gamma4_2_2   | = | -0.02038 | , ev |
| 203 | gamma4_3_3   | = | -0.00285 | , ev |
| 204 | gamma4_3_23  | = | -0.00040 | , ev |
| 205 | gamma4_3_24  | = | 0.00160  | , ev |
| 206 | gamma4_5_5   | = | -0.00540 | , ev |
| 207 | gamma4_6_6   | = | 0.00702  | , ev |
| 208 | gamma4_7_7   | = | 0.02001  | , ev |
| 209 | gamma4_7_21  | = | 0.00010  | , ev |
| 210 | gamma4_7_23  | = | -0.00030 | , ev |
| 211 | gamma4_7_24  | = | 0.00080  | , ev |
| 212 | gamma4_8_8   | = | 0.00868  | , ev |
| 213 | gamma4_9_9   | = | -0.05547 | , ev |
| 214 | gamma4_10_10 | = | 0.00350  | , ev |
| 215 | gamma4_12_12 | = | -0.00889 | , ev |
| 216 | gamma4_13_13 | = | 0.01293  | , ev |
| 217 | gamma4_14_14 | = | 0.02123  | , ev |
| 218 | gamma4_15_15 | = | -0.00973 | , ev |
| 219 | gamma4_16_16 | = | -0.00976 | , ev |
| 220 | gamma4_17_17 | = | 0.00067  | , ev |
| 221 | gamma4_18_18 | = | -0.04629 | , ev |
| 222 | gamma4_18_21 | = | -0.00030 | , ev |
| 223 | gamma4_18_23 | = | 0.00050  | , ev |
| 224 | gamma4_18_24 | = | -0.00090 | , ev |
| 225 | gamma4_19_21 | = | 0.00020  | , ev |
| 226 | gamma4_19_23 | = | 0.00030  | , ev |
| 227 | gamma4_19_24 | = | -0.00190 | , ev |
| 228 | gamma4_20_20 | = | -0.00813 | , ev |
| 229 | gamma4_21_23 | = | -0.00090 | , ev |
| 230 | gamma4_21_24 | = | 0.00050  | , ev |
| 231 | gamma4_23_23 | = | 0.18860  | , ev |
| 232 | gamma4_23_24 | = | 0.00250  | , ev |
| 233 | gamma4_24_24 | = | 0.41440  | , ev |
| 234 | gamma5_2_2   | = | -0.03203 | , ev |
| 235 | gamma5_3_3   | = | -0.01742 | , ev |
| 236 | gamma5_3_21  | = | 0.00010  | , ev |
| 237 | gamma5_3_23  | = | -0.00050 | , ev |
| 238 | gamma5_3_24  | = | 0.00160  | , ev |
| 239 | gamma5_5_5   | = | -0.01297 | , ev |
| 240 | gamma5_6_6   | = | 0.02032  | , ev |

```

241 gamma5_7_7 = -0.00827 , ev
242 gamma5_7_19 = 0.00020 , ev
243 gamma5_7_23 = -0.00030 , ev
244 gamma5_7_24 = 0.00070 , ev
245 gamma5_8_8 = 0.00365 , ev
246 gamma5_9_9 = -0.07860 , ev
247 gamma5_10_10 = -0.02081 , ev
248 gamma5_12_12 = -0.01105 , ev
249 gamma5_13_13 = -0.03406 , ev
250 gamma5_14_14 = 0.02246 , ev
251 gamma5_15_15 = -0.01948 , ev
252 gamma5_16_16 = -0.00925 , ev
253 gamma5_17_17 = 0.00384 , ev
254 gamma5_18_18 = -0.02000 , ev
255 gamma5_18_19 = -0.00010 , ev
256 gamma5_18_21 = -0.00020 , ev
257 gamma5_18_23 = 0.00050 , ev
258 gamma5_18_24 = -0.00090 , ev
259 gamma5_19_23 = -0.00010 , ev
260 gamma5_19_24 = -0.00180 , ev
261 gamma5_20_20 = -0.03978 , ev
262 gamma5_21_23 = -0.00100 , ev
263 gamma5_21_24 = 0.00060 , ev
264 gamma5_23_23 = 0.14800 , ev
265 gamma5_23_24 = 0.00260 , ev
266 gamma5_24_24 = 0.32680 , ev
267
268 # Diabatic Curves with Parameters
269
270 1EPm1 = 0.02953750 , ev
271 1GAm1 = 0.00932715 , ev
272 2EPm1 = 0.02669442 , ev
273 2GAm1 = 0.00424668 , ev
274 3EPm1 = 0.02580022 , ev
275 3GAm1 = 0.00303797 , ev
276 4EPm1 = 0.02777598 , ev
277 4GAm1 = 0.02667294 , ev
278 5EPm1 = 0.02646936 , ev
279 5GAm1 = -0.00568607 , ev
280 1EPm4 = 0.16044840 , ev
281 1GAm4 = 0.06389122 , ev
282 2EPm4 = 0.16335388 , ev
283 2GAm4 = 0.04196290 , ev
284 3EPm4 = 0.19406492 , ev
285 3GAm4 = 0.02985938 , ev
286 4EPm4 = 0.12221038 , ev
287 4GAm4 = 0.08889845 , ev
288 5EPm4 = 0.12922395 , ev
289 5GAm4 = 0.06460660 , ev
290 1D_11 = 7.49022084 , ev
291 1A_11 = 0.08740201
292 1X_11 = -0.27403853
293 1E_11 = 0.00000000
294 2D_11 = 8.01298486 , ev
295 2A_11 = 0.08749234
296 2X_11 = -0.87974735
297 2E_11 = 0.00000000
298 3D_11 = 8.47057780 , ev
299 3A_11 = 0.08788952
300 3X_11 = -0.98169116

```

|     |        |   |             |      |
|-----|--------|---|-------------|------|
| 301 | 3E_11  | = | 0.00000000  |      |
| 302 | 4D_11  | = | 9.42188428  | , ev |
| 303 | 4A_11  | = | 0.08491312  |      |
| 304 | 4X_11  | = | -1.39264070 |      |
| 305 | 4E_11  | = | 0.00000000  |      |
| 306 | 5D_11  | = | 8.61069021  | , ev |
| 307 | 5A_11  | = | 0.08613512  |      |
| 308 | 5X_11  | = | -1.10000000 |      |
| 309 | 5E_11  | = | 0.00000000  |      |
| 310 | 1D_19  | = | 98.99896190 | , ev |
| 311 | 1A_19  | = | -0.03229799 |      |
| 312 | 1X_19  | = | -0.37352548 |      |
| 313 | 1E_19  | = | 0.00000000  |      |
| 314 | 2D_19  | = | 98.99894596 | , ev |
| 315 | 2A_19  | = | -0.03150321 |      |
| 316 | 2X_19  | = | -0.60265617 |      |
| 317 | 2E_19  | = | 0.00000000  |      |
| 318 | 3D_19  | = | 98.99889264 | , ev |
| 319 | 3A_19  | = | -0.03054705 |      |
| 320 | 3X_19  | = | -1.03500346 |      |
| 321 | 3E_19  | = | 0.00000000  |      |
| 322 | 4D_19  | = | 98.99894499 | , ev |
| 323 | 4A_19  | = | -0.03148955 |      |
| 324 | 4X_19  | = | -1.14453090 |      |
| 325 | 4E_19  | = | 0.00000000  |      |
| 326 | 5D_19  | = | 98.99796281 | , ev |
| 327 | 5A_19  | = | -0.03000000 |      |
| 328 | 5X_19  | = | -1.43979206 |      |
| 329 | 5E_19  | = | 0.00000000  |      |
| 330 | 1D_21  | = | 98.99998223 | , ev |
| 331 | 1A_21  | = | -0.03393087 |      |
| 332 | 1X_21  | = | -0.14964156 |      |
| 333 | 1E_21  | = | 0.00000000  |      |
| 334 | 2D_21  | = | 98.99898909 | , ev |
| 335 | 2A_21  | = | -0.03080050 |      |
| 336 | 2X_21  | = | -1.28335964 |      |
| 337 | 2E_21  | = | 0.00000000  |      |
| 338 | 3D_21  | = | 98.99798507 | , ev |
| 339 | 3A_21  | = | -0.03140394 |      |
| 340 | 3X_21  | = | -1.81955451 |      |
| 341 | 3E_21  | = | 0.00000000  |      |
| 342 | 4D_21  | = | 99.00099674 | , ev |
| 343 | 4A_21  | = | -0.03189363 |      |
| 344 | 4X_21  | = | -0.65315449 |      |
| 345 | 4E_21  | = | 0.00000000  |      |
| 346 | 5D_21  | = | 98.99898221 | , ev |
| 347 | 5A_21  | = | -0.03180336 |      |
| 348 | 5X_21  | = | -1.20000000 |      |
| 349 | 5E_21  | = | 0.00000000  |      |
| 350 | 1EPm22 | = | 0.07905662  | , ev |
| 351 | 1GAm22 | = | -0.01111726 | , ev |
| 352 | 2EPm22 | = | 0.07849771  | , ev |
| 353 | 2GAm22 | = | -0.00914977 | , ev |
| 354 | 3EPm22 | = | 0.07912041  | , ev |
| 355 | 3GAm22 | = | -0.01457494 | , ev |
| 356 | 4EPm22 | = | 0.07611320  | , ev |
| 357 | 4GAm22 | = | -0.00407954 | , ev |
| 358 | 5EPm22 | = | 0.07402383  | , ev |
| 359 | 5GAm22 | = | 0.00036484  | , ev |
| 360 | 1D_23  | = | 8.84700741  | , ev |



```

361 1A_23 = -0.15210754
362 1X_23 = 0.04040257
363 1E_23 = 0.00000000
364 2D_23 = 8.92723004 , ev
365 2A_23 = -0.15227466
366 2X_23 = 0.06917546
367 2E_23 = 0.00000000
368 3D_23 = 7.01717240 , ev
369 3A_23 = -0.16660540
370 3X_23 = 0.09089346
371 3E_23 = 0.00000000
372 4D_23 = 7.01783796 , ev
373 4A_23 = -0.16677994
374 4X_23 = 0.09015606
375 4E_23 = 0.00000000
376 5D_23 = 10.63103976 , ev
377 5A_23 = -0.14367132
378 5X_23 = 0.09923984
379 5E_23 = 0.00000000
380 1D_24 = 4.09820678 , ev
381 1A_24 = 0.27737724
382 1X_24 = -0.53445499
383 1E_24 = 0.00000000
384 2D_24 = 4.89403508 , ev
385 2A_24 = 0.23235153
386 2X_24 = -0.08894778
387 2E_24 = 0.00000000
388 3D_24 = 4.93739020 , ev
389 3A_24 = 0.23351534
390 3X_24 = -0.23151132
391 3E_24 = 0.00000000
392 4D_24 = 5.39001484 , ev
393 4A_24 = 0.22928893
394 4X_24 = -0.15237473
395 4E_24 = 0.00000000
396 5D_24 = 4.95930645 , ev
397 5A_24 = 0.18665039
398 5X_24 = 0.29467437
399 5E_24 = 0.00000000
400
401 end-parameter-section
402
403 LABELS-SECTION
404
405 # Diabatic Function Labels
406
407 v1m11=morse1 [1D_11,1A_11,1X_11,1E_11]
408 v2m11=morse1 [2D_11,2A_11,2X_11,2E_11]
409 v3m11=morse1 [3D_11,3A_11,3X_11,3E_11]
410 v4m11=morse1 [4D_11,4A_11,4X_11,4E_11]
411 v5m11=morse1 [5D_11,5A_11,5X_11,5E_11]
412 v1m19=morse1 [1D_19,1A_19,1X_19,1E_19]
413 v2m19=morse1 [2D_19,2A_19,2X_19,2E_19]
414 v3m19=morse1 [3D_19,3A_19,3X_19,3E_19]
415 v4m19=morse1 [4D_19,4A_19,4X_19,4E_19]
416 v5m19=morse1 [5D_19,5A_19,5X_19,5E_19]
417 v1m21=morse1 [1D_21,1A_21,1X_21,1E_21]
418 v2m21=morse1 [2D_21,2A_21,2X_21,2E_21]
419 v3m21=morse1 [3D_21,3A_21,3X_21,3E_21]
420 v4m21=morse1 [4D_21,4A_21,4X_21,4E_21]

```

```

421 v5m21=morse1 [5D_21,5A_21,5X_21,5E_21]
422 v1m23=morse1 [1D_23,1A_23,1X_23,1E_23]
423 v2m23=morse1 [2D_23,2A_23,2X_23,2E_23]
424 v3m23=morse1 [3D_23,3A_23,3X_23,3E_23]
425 v4m23=morse1 [4D_23,4A_23,4X_23,4E_23]
426 v5m23=morse1 [5D_23,5A_23,5X_23,5E_23]
427 v1m24=morse1 [1D_24,1A_24,1X_24,1E_24]
428 v2m24=morse1 [2D_24,2A_24,2X_24,2E_24]
429 v3m24=morse1 [3D_24,3A_24,3X_24,3E_24]
430 v4m24=morse1 [4D_24,4A_24,4X_24,4E_24]
431 v5m24=morse1 [5D_24,5A_24,5X_24,5E_24]
432
433 end-labels-section
434
435 HAMILTONIAN-SECTION
436
437 -----
438 modes| v1 | v2 | v3 | v4 | v5 | v6 | v7 | v8 | v9 | v10 |
439 modes| v11 | v12 | v13 | v14 | v15 | v16 | v17 | v18 | v19 | v20 |
440 modes| v21 | v22 | v23 | v24 | e1
441 -----
442
443 # Kinetic Energy
444
445 omega_1 |1 KE
446 omega_2 |2 KE
447 omega_3 |3 KE
448 omega_4 |4 KE
449 omega_5 |5 KE
450 omega_6 |6 KE
451 omega_7 |7 KE
452 omega_8 |8 KE
453 omega_9 |9 KE
454 omega_10 |10 KE
455 omega_11 |11 KE
456 omega_12 |12 KE
457 omega_13 |13 KE
458 omega_14 |14 KE
459 omega_15 |15 KE
460 omega_16 |16 KE
461 omega_17 |17 KE
462 omega_18 |18 KE
463 omega_19 |19 KE
464 omega_20 |20 KE
465 omega_21 |21 KE
466 omega_22 |22 KE
467 omega_23 |23 KE
468 omega_24 |24 KE
469
470 # Potential for Harmonic Oscillator
471
472 0.5*omega_1 |1 q^2
473 0.5*omega_2 |2 q^2
474 0.5*omega_3 |3 q^2
475 0.5*omega_4 |4 q^2
476 0.5*omega_5 |5 q^2
477 0.5*omega_6 |6 q^2
478 0.5*omega_7 |7 q^2
479 0.5*omega_8 |8 q^2
480 0.5*omega_9 |9 q^2

```

|     |                            |    |     |         |
|-----|----------------------------|----|-----|---------|
| 481 | 0.5*omega_10               | 10 | q^2 |         |
| 482 | 0.5*omega_12               | 12 | q^2 |         |
| 483 | 0.5*omega_13               | 13 | q^2 |         |
| 484 | 0.5*omega_14               | 14 | q^2 |         |
| 485 | 0.5*omega_15               | 15 | q^2 |         |
| 486 | 0.5*omega_16               | 16 | q^2 |         |
| 487 | 0.5*omega_17               | 17 | q^2 |         |
| 488 | 0.5*omega_18               | 18 | q^2 |         |
| 489 | 0.5*omega_20               | 20 | q^2 |         |
| 490 | 0.5*omega_22               | 22 | q^2 |         |
| 491 |                            |    |     |         |
| 492 | # <i>Electronic States</i> |    |     |         |
| 493 |                            |    |     |         |
| 494 | E1                         | 25 |     | S1&1    |
| 495 | E2                         | 25 |     | S2&2    |
| 496 | E3                         | 25 |     | S3&3    |
| 497 | E4                         | 25 |     | S4&4    |
| 498 | E5                         | 25 |     | S5&5    |
| 499 |                            |    |     |         |
| 500 | # <i>Lambda</i>            |    |     |         |
| 501 |                            |    |     |         |
| 502 | lambda1_2_1                | 1  | q   | 25 S1&2 |
| 503 | lambda3_5_1                | 1  | q   | 25 S3&5 |
| 504 | lambda1_3_2                | 2  | q   | 25 S1&3 |
| 505 | lambda2_4_2                | 2  | q   | 25 S2&4 |
| 506 | lambda2_5_2                | 2  | q   | 25 S2&5 |
| 507 | lambda4_5_3                | 3  | q   | 25 S4&5 |
| 508 | lambda1_2_4                | 4  | q   | 25 S1&2 |
| 509 | lambda3_4_4                | 4  | q   | 25 S3&4 |
| 510 | lambda3_4_1                | 1  | q   | 25 S3&4 |
| 511 | lambda3_5_4                | 4  | q   | 25 S3&5 |
| 512 | lambda1_4_5                | 5  | q   | 25 S1&4 |
| 513 | lambda1_5_5                | 5  | q   | 25 S1&5 |
| 514 | lambda2_3_5                | 5  | q   | 25 S2&3 |
| 515 | lambda1_2_6                | 6  | q   | 25 S1&2 |
| 516 | lambda3_4_6                | 6  | q   | 25 S3&4 |
| 517 | lambda3_5_6                | 6  | q   | 25 S3&5 |
| 518 | lambda4_5_7                | 7  | q   | 25 S4&5 |
| 519 | lambda1_4_8                | 8  | q   | 25 S1&4 |
| 520 | lambda1_5_8                | 8  | q   | 25 S1&5 |
| 521 | lambda2_3_8                | 8  | q   | 25 S2&3 |
| 522 | lambda1_3_9                | 9  | q   | 25 S1&3 |
| 523 | lambda2_4_9                | 9  | q   | 25 S2&4 |
| 524 | lambda2_5_9                | 9  | q   | 25 S2&5 |
| 525 | lambda1_2_10               | 10 | q   | 25 S1&2 |
| 526 | lambda3_4_10               | 10 | q   | 25 S3&4 |
| 527 | lambda3_5_10               | 10 | q   | 25 S3&5 |
| 528 | lambda4_5_11               | 11 | q   | 25 S4&5 |
| 529 | lambda1_4_12               | 12 | q   | 25 S1&4 |
| 530 | lambda1_5_12               | 12 | q   | 25 S1&5 |
| 531 | lambda2_3_12               | 12 | q   | 25 S2&3 |
| 532 | lambda1_3_13               | 13 | q   | 25 S1&3 |
| 533 | lambda2_4_13               | 13 | q   | 25 S2&4 |
| 534 | lambda2_5_13               | 13 | q   | 25 S2&5 |
| 535 | lambda4_5_14               | 14 | q   | 25 S4&5 |
| 536 | lambda1_4_15               | 15 | q   | 25 S1&4 |
| 537 | lambda1_5_15               | 15 | q   | 25 S1&5 |
| 538 | lambda2_3_15               | 15 | q   | 25 S2&3 |
| 539 | lambda1_4_16               | 16 | q   | 25 S1&4 |
| 540 | lambda1_5_16               | 16 | q   | 25 S1&5 |

|     |                                      |    |                      |    |      |
|-----|--------------------------------------|----|----------------------|----|------|
| 541 | lambda2_3_16                         | 16 | <b>q</b>             | 25 | S2&3 |
| 542 | lambda1_4_17                         | 17 | <b>q</b>             | 25 | S1&4 |
| 543 | lambda1_5_17                         | 17 | <b>q</b>             | 25 | S1&5 |
| 544 | lambda2_3_17                         | 17 | <b>q</b>             | 25 | S2&3 |
| 545 | lambda4_5_18                         | 18 | <b>q</b>             | 25 | S4&5 |
| 546 | lambda4_5_19                         | 19 | <b>q</b>             | 25 | S4&5 |
| 547 | lambda1_4_20                         | 20 | <b>q</b>             | 25 | S1&4 |
| 548 | lambda1_5_20                         | 20 | <b>q</b>             | 25 | S1&5 |
| 549 | lambda2_3_20                         | 20 | <b>q</b>             | 25 | S2&3 |
| 550 | lambda4_5_21                         | 21 | <b>q</b>             | 25 | S4&5 |
| 551 | lambda1_4_22                         | 22 | <b>q</b>             | 25 | S1&4 |
| 552 | lambda1_5_22                         | 22 | <b>q</b>             | 25 | S1&5 |
| 553 | lambda2_3_22                         | 22 | <b>q</b>             | 25 | S2&3 |
| 554 | lambda4_5_23                         | 23 | <b>q</b>             | 25 | S4&5 |
| 555 | lambda4_5_24                         | 24 | <b>q</b>             | 25 | S4&5 |
| 556 |                                      |    |                      |    |      |
| 557 | <i># Kappa</i>                       |    |                      |    |      |
| 558 |                                      |    |                      |    |      |
| 559 | kappa2_3                             | 3  | <b>q</b>             | 25 | S2&2 |
| 560 | kappa3_3                             | 3  | <b>q</b>             | 25 | S3&3 |
| 561 | kappa4_3                             | 3  | <b>q</b>             | 25 | S4&4 |
| 562 | kappa5_3                             | 3  | <b>q</b>             | 25 | S5&5 |
| 563 | kappa2_7                             | 7  | <b>q</b>             | 25 | S2&2 |
| 564 | kappa3_7                             | 7  | <b>q</b>             | 25 | S3&3 |
| 565 | kappa4_7                             | 7  | <b>q</b>             | 25 | S4&4 |
| 566 | kappa5_7                             | 7  | <b>q</b>             | 25 | S5&5 |
| 567 | kappa2_14                            | 14 | <b>q</b>             | 25 | S2&2 |
| 568 | kappa3_14                            | 14 | <b>q</b>             | 25 | S3&3 |
| 569 | kappa4_14                            | 14 | <b>q</b>             | 25 | S4&4 |
| 570 | kappa5_14                            | 14 | <b>q</b>             | 25 | S5&5 |
| 571 | kappa2_18                            | 18 | <b>q</b>             | 25 | S2&2 |
| 572 | kappa3_18                            | 18 | <b>q</b>             | 25 | S3&3 |
| 573 | kappa4_18                            | 18 | <b>q</b>             | 25 | S4&4 |
| 574 | kappa5_18                            | 18 | <b>q</b>             | 25 | S5&5 |
| 575 |                                      |    |                      |    |      |
| 576 | <i># On-Diagonal Gamma Constants</i> |    |                      |    |      |
| 577 |                                      |    |                      |    |      |
| 578 | 0.5*gamma2_2_2                       | 2  | <b>q<sup>2</sup></b> | 25 | S2&2 |
| 579 | 0.5*gamma3_2_2                       | 2  | <b>q<sup>2</sup></b> | 25 | S3&3 |
| 580 | 0.5*gamma4_2_2                       | 2  | <b>q<sup>2</sup></b> | 25 | S4&4 |
| 581 | 0.5*gamma5_2_2                       | 2  | <b>q<sup>2</sup></b> | 25 | S5&5 |
| 582 | 0.5*gamma2_3_3                       | 3  | <b>q<sup>2</sup></b> | 25 | S2&2 |
| 583 | 0.5*gamma3_3_3                       | 3  | <b>q<sup>2</sup></b> | 25 | S3&3 |
| 584 | 0.5*gamma4_3_3                       | 3  | <b>q<sup>2</sup></b> | 25 | S4&4 |
| 585 | 0.5*gamma5_3_3                       | 3  | <b>q<sup>2</sup></b> | 25 | S5&5 |
| 586 | 0.5*gamma2_5_5                       | 5  | <b>q<sup>2</sup></b> | 25 | S2&2 |
| 587 | 0.5*gamma3_5_5                       | 5  | <b>q<sup>2</sup></b> | 25 | S3&3 |
| 588 | 0.5*gamma4_5_5                       | 5  | <b>q<sup>2</sup></b> | 25 | S4&4 |
| 589 | 0.5*gamma5_5_5                       | 5  | <b>q<sup>2</sup></b> | 25 | S5&5 |
| 590 | 0.5*gamma2_6_6                       | 6  | <b>q<sup>2</sup></b> | 25 | S2&2 |
| 591 | 0.5*gamma3_6_6                       | 6  | <b>q<sup>2</sup></b> | 25 | S3&3 |
| 592 | 0.5*gamma4_6_6                       | 6  | <b>q<sup>2</sup></b> | 25 | S4&4 |
| 593 | 0.5*gamma5_6_6                       | 6  | <b>q<sup>2</sup></b> | 25 | S5&5 |
| 594 | 0.5*gamma2_7_7                       | 7  | <b>q<sup>2</sup></b> | 25 | S2&2 |
| 595 | 0.5*gamma3_7_7                       | 7  | <b>q<sup>2</sup></b> | 25 | S3&3 |
| 596 | 0.5*gamma4_7_7                       | 7  | <b>q<sup>2</sup></b> | 25 | S4&4 |
| 597 | 0.5*gamma5_7_7                       | 7  | <b>q<sup>2</sup></b> | 25 | S5&5 |
| 598 | 0.5*gamma2_8_8                       | 8  | <b>q<sup>2</sup></b> | 25 | S2&2 |
| 599 | 0.5*gamma3_8_8                       | 8  | <b>q<sup>2</sup></b> | 25 | S3&3 |
| 600 | 0.5*gamma4_8_8                       | 8  | <b>q<sup>2</sup></b> | 25 | S4&4 |

|     |                                 |    |       |    |      |
|-----|---------------------------------|----|-------|----|------|
| 601 | $0.5 * \text{gamma5}_{8_8}$     | 8  | $q^2$ | 25 | S5&5 |
| 602 | $0.5 * \text{gamma2}_{9_9}$     | 9  | $q^2$ | 25 | S2&2 |
| 603 | $0.5 * \text{gamma3}_{9_9}$     | 9  | $q^2$ | 25 | S3&3 |
| 604 | $0.5 * \text{gamma4}_{9_9}$     | 9  | $q^2$ | 25 | S4&4 |
| 605 | $0.5 * \text{gamma5}_{9_9}$     | 9  | $q^2$ | 25 | S5&5 |
| 606 | $0.5 * \text{gamma2}_{10_{10}}$ | 10 | $q^2$ | 25 | S2&2 |
| 607 | $0.5 * \text{gamma3}_{10_{10}}$ | 10 | $q^2$ | 25 | S3&3 |
| 608 | $0.5 * \text{gamma4}_{10_{10}}$ | 10 | $q^2$ | 25 | S4&4 |
| 609 | $0.5 * \text{gamma5}_{10_{10}}$ | 10 | $q^2$ | 25 | S5&5 |
| 610 | $0.5 * \text{gamma2}_{12_{12}}$ | 12 | $q^2$ | 25 | S2&2 |
| 611 | $0.5 * \text{gamma3}_{12_{12}}$ | 12 | $q^2$ | 25 | S3&3 |
| 612 | $0.5 * \text{gamma4}_{12_{12}}$ | 12 | $q^2$ | 25 | S4&4 |
| 613 | $0.5 * \text{gamma5}_{12_{12}}$ | 12 | $q^2$ | 25 | S5&5 |
| 614 | $0.5 * \text{gamma2}_{13_{13}}$ | 13 | $q^2$ | 25 | S2&2 |
| 615 | $0.5 * \text{gamma3}_{13_{13}}$ | 13 | $q^2$ | 25 | S3&3 |
| 616 | $0.5 * \text{gamma4}_{13_{13}}$ | 13 | $q^2$ | 25 | S4&4 |
| 617 | $0.5 * \text{gamma5}_{13_{13}}$ | 13 | $q^2$ | 25 | S5&5 |
| 618 | $0.5 * \text{gamma2}_{14_{14}}$ | 14 | $q^2$ | 25 | S2&2 |
| 619 | $0.5 * \text{gamma3}_{14_{14}}$ | 14 | $q^2$ | 25 | S3&3 |
| 620 | $0.5 * \text{gamma4}_{14_{14}}$ | 14 | $q^2$ | 25 | S4&4 |
| 621 | $0.5 * \text{gamma5}_{14_{14}}$ | 14 | $q^2$ | 25 | S5&5 |
| 622 | $0.5 * \text{gamma2}_{15_{15}}$ | 15 | $q^2$ | 25 | S2&2 |
| 623 | $0.5 * \text{gamma3}_{15_{15}}$ | 15 | $q^2$ | 25 | S3&3 |
| 624 | $0.5 * \text{gamma4}_{15_{15}}$ | 15 | $q^2$ | 25 | S4&4 |
| 625 | $0.5 * \text{gamma5}_{15_{15}}$ | 15 | $q^2$ | 25 | S5&5 |
| 626 | $0.5 * \text{gamma2}_{16_{16}}$ | 16 | $q^2$ | 25 | S2&2 |
| 627 | $0.5 * \text{gamma3}_{16_{16}}$ | 16 | $q^2$ | 25 | S3&3 |
| 628 | $0.5 * \text{gamma4}_{16_{16}}$ | 16 | $q^2$ | 25 | S4&4 |
| 629 | $0.5 * \text{gamma5}_{16_{16}}$ | 16 | $q^2$ | 25 | S5&5 |
| 630 | $0.5 * \text{gamma2}_{17_{17}}$ | 17 | $q^2$ | 25 | S2&2 |
| 631 | $0.5 * \text{gamma3}_{17_{17}}$ | 17 | $q^2$ | 25 | S3&3 |
| 632 | $0.5 * \text{gamma4}_{17_{17}}$ | 17 | $q^2$ | 25 | S4&4 |
| 633 | $0.5 * \text{gamma5}_{17_{17}}$ | 17 | $q^2$ | 25 | S5&5 |
| 634 | $0.5 * \text{gamma2}_{18_{18}}$ | 18 | $q^2$ | 25 | S2&2 |
| 635 | $0.5 * \text{gamma3}_{18_{18}}$ | 18 | $q^2$ | 25 | S3&3 |
| 636 | $0.5 * \text{gamma4}_{18_{18}}$ | 18 | $q^2$ | 25 | S4&4 |
| 637 | $0.5 * \text{gamma5}_{18_{18}}$ | 18 | $q^2$ | 25 | S5&5 |
| 638 | $0.5 * \text{gamma2}_{20_{20}}$ | 20 | $q^2$ | 25 | S2&2 |
| 639 | $0.5 * \text{gamma3}_{20_{20}}$ | 20 | $q^2$ | 25 | S3&3 |
| 640 | $0.5 * \text{gamma4}_{20_{20}}$ | 20 | $q^2$ | 25 | S4&4 |
| 641 | $0.5 * \text{gamma5}_{20_{20}}$ | 20 | $q^2$ | 25 | S5&5 |

642

643 # Off-Diagonal Gamma Constants

644

|     |                          |   |     |    |     |    |      |
|-----|--------------------------|---|-----|----|-----|----|------|
| 645 | $\text{gamma4}_{1_4}$    | 1 | $q$ | 4  | $q$ | 25 | S4&4 |
| 646 | $\text{gamma5}_{3_{21}}$ | 3 | $q$ | 21 | $q$ | 25 | S5&5 |
| 647 | $\text{gamma2}_{3_{23}}$ | 3 | $q$ | 23 | $q$ | 25 | S2&2 |
| 648 | $\text{gamma3}_{3_{23}}$ | 3 | $q$ | 23 | $q$ | 25 | S3&3 |
| 649 | $\text{gamma4}_{3_{23}}$ | 3 | $q$ | 23 | $q$ | 25 | S4&4 |
| 650 | $\text{gamma5}_{3_{23}}$ | 3 | $q$ | 23 | $q$ | 25 | S5&5 |
| 651 | $\text{gamma2}_{3_{24}}$ | 3 | $q$ | 24 | $q$ | 25 | S2&2 |
| 652 | $\text{gamma3}_{3_{24}}$ | 3 | $q$ | 24 | $q$ | 25 | S3&3 |
| 653 | $\text{gamma4}_{3_{24}}$ | 3 | $q$ | 24 | $q$ | 25 | S4&4 |
| 654 | $\text{gamma5}_{3_{24}}$ | 3 | $q$ | 24 | $q$ | 25 | S5&5 |
| 655 | $\text{gamma5}_{7_{19}}$ | 7 | $q$ | 19 | $q$ | 25 | S5&5 |
| 656 | $\text{gamma4}_{7_{21}}$ | 7 | $q$ | 21 | $q$ | 25 | S4&4 |
| 657 | $\text{gamma2}_{7_{23}}$ | 7 | $q$ | 23 | $q$ | 25 | S2&2 |
| 658 | $\text{gamma3}_{7_{23}}$ | 7 | $q$ | 23 | $q$ | 25 | S3&3 |
| 659 | $\text{gamma4}_{7_{23}}$ | 7 | $q$ | 23 | $q$ | 25 | S4&4 |
| 660 | $\text{gamma5}_{7_{23}}$ | 7 | $q$ | 23 | $q$ | 25 | S5&5 |

|     |                              |    |       |    |   |    |      |
|-----|------------------------------|----|-------|----|---|----|------|
| 661 | gamma2_7_24                  | 7  | q     | 24 | q | 25 | S2&2 |
| 662 | gamma3_7_24                  | 7  | q     | 24 | q | 25 | S3&3 |
| 663 | gamma4_7_24                  | 7  | q     | 24 | q | 25 | S4&4 |
| 664 | gamma5_7_24                  | 7  | q     | 24 | q | 25 | S5&5 |
| 665 | gamma2_18_19                 | 18 | q     | 19 | q | 25 | S2&2 |
| 666 | gamma5_18_19                 | 18 | q     | 19 | q | 25 | S5&5 |
| 667 | gamma4_18_21                 | 18 | q     | 21 | q | 25 | S4&4 |
| 668 | gamma5_18_21                 | 18 | q     | 21 | q | 25 | S5&5 |
| 669 | gamma2_18_23                 | 18 | q     | 23 | q | 25 | S2&2 |
| 670 | gamma3_18_23                 | 18 | q     | 23 | q | 25 | S3&3 |
| 671 | gamma4_18_23                 | 18 | q     | 23 | q | 25 | S4&4 |
| 672 | gamma5_18_23                 | 18 | q     | 23 | q | 25 | S5&5 |
| 673 | gamma2_18_24                 | 18 | q     | 24 | q | 25 | S2&2 |
| 674 | gamma3_18_24                 | 18 | q     | 24 | q | 25 | S3&3 |
| 675 | gamma4_18_24                 | 18 | q     | 24 | q | 25 | S4&4 |
| 676 | gamma5_18_24                 | 18 | q     | 24 | q | 25 | S5&5 |
| 677 | gamma4_19_21                 | 19 | q     | 21 | q | 25 | S4&4 |
| 678 | gamma2_19_23                 | 19 | q     | 23 | q | 25 | S2&2 |
| 679 | gamma4_19_23                 | 19 | q     | 23 | q | 25 | S4&4 |
| 680 | gamma5_19_23                 | 19 | q     | 23 | q | 25 | S5&5 |
| 681 | gamma2_19_24                 | 19 | q     | 24 | q | 25 | S2&2 |
| 682 | gamma3_19_24                 | 19 | q     | 24 | q | 25 | S3&3 |
| 683 | gamma4_19_24                 | 19 | q     | 24 | q | 25 | S4&4 |
| 684 | gamma5_19_24                 | 19 | q     | 24 | q | 25 | S5&5 |
| 685 | gamma2_21_23                 | 21 | q     | 23 | q | 25 | S2&2 |
| 686 | gamma3_21_23                 | 21 | q     | 23 | q | 25 | S3&3 |
| 687 | gamma4_21_23                 | 21 | q     | 23 | q | 25 | S4&4 |
| 688 | gamma5_21_23                 | 21 | q     | 23 | q | 25 | S5&5 |
| 689 | gamma2_21_24                 | 21 | q     | 24 | q | 25 | S2&2 |
| 690 | gamma3_21_24                 | 21 | q     | 24 | q | 25 | S3&3 |
| 691 | gamma4_21_24                 | 21 | q     | 24 | q | 25 | S4&4 |
| 692 | gamma5_21_24                 | 21 | q     | 24 | q | 25 | S5&5 |
| 693 | gamma2_23_24                 | 23 | q     | 24 | q | 25 | S2&2 |
| 694 | gamma3_23_24                 | 23 | q     | 24 | q | 25 | S3&3 |
| 695 | gamma4_23_24                 | 23 | q     | 24 | q | 25 | S4&4 |
| 696 | gamma5_23_24                 | 23 | q     | 24 | q | 25 | S5&5 |
| 697 |                              |    |       |    |   |    |      |
| 698 | # Morse/Anti-Morse Potential |    |       |    |   |    |      |
| 699 |                              |    |       |    |   |    |      |
| 700 | 1.0                          | 11 | v1m11 |    |   | 25 | S1&1 |
| 701 | 1.0                          | 11 | v2m11 |    |   | 25 | S2&2 |
| 702 | 1.0                          | 11 | v3m11 |    |   | 25 | S3&3 |
| 703 | 1.0                          | 11 | v4m11 |    |   | 25 | S4&4 |
| 704 | 1.0                          | 11 | v5m11 |    |   | 25 | S5&5 |
| 705 | 1.0                          | 19 | v1m19 |    |   | 25 | S1&1 |
| 706 | 1.0                          | 19 | v2m19 |    |   | 25 | S2&2 |
| 707 | 1.0                          | 19 | v3m19 |    |   | 25 | S3&3 |
| 708 | 1.0                          | 19 | v4m19 |    |   | 25 | S4&4 |
| 709 | 1.0                          | 19 | v5m19 |    |   | 25 | S5&5 |
| 710 | 1.0                          | 21 | v1m21 |    |   | 25 | S1&1 |
| 711 | 1.0                          | 21 | v2m21 |    |   | 25 | S2&2 |
| 712 | 1.0                          | 21 | v3m21 |    |   | 25 | S3&3 |
| 713 | 1.0                          | 21 | v4m21 |    |   | 25 | S4&4 |
| 714 | 1.0                          | 21 | v5m21 |    |   | 25 | S5&5 |
| 715 | 1.0                          | 23 | v1m23 |    |   | 25 | S1&1 |
| 716 | 1.0                          | 23 | v2m23 |    |   | 25 | S2&2 |
| 717 | 1.0                          | 23 | v3m23 |    |   | 25 | S3&3 |
| 718 | 1.0                          | 23 | v4m23 |    |   | 25 | S4&4 |
| 719 | 1.0                          | 23 | v5m23 |    |   | 25 | S5&5 |
| 720 | 1.0                          | 24 | v1m24 |    |   | 25 | S1&1 |

|     |                         |    |       |    |      |
|-----|-------------------------|----|-------|----|------|
| 721 | 1.0                     | 24 | v2m24 | 25 | S2&2 |
| 722 | 1.0                     | 24 | v3m24 | 25 | S3&3 |
| 723 | 1.0                     | 24 | v4m24 | 25 | S4&4 |
| 724 | 1.0                     | 24 | v5m24 | 25 | S5&5 |
| 725 |                         |    |       |    |      |
| 726 | # Quartic Potential     |    |       |    |      |
| 727 |                         |    |       |    |      |
| 728 | 0.041667*1EPm1          | 1  | q^4   | 25 | S1&1 |
| 729 | 0.50000*1GAm1           | 1  | q^2   | 25 | S1&1 |
| 730 | 0.041667*2EPm1          | 1  | q^4   | 25 | S2&2 |
| 731 | 0.50000*2GAm1           | 1  | q^2   | 25 | S2&2 |
| 732 | 0.041667*3EPm1          | 1  | q^4   | 25 | S3&3 |
| 733 | 0.50000*3GAm1           | 1  | q^2   | 25 | S3&3 |
| 734 | 0.041667*4EPm1          | 1  | q^4   | 25 | S4&4 |
| 735 | 0.50000*4GAm1           | 1  | q^2   | 25 | S4&4 |
| 736 | 0.041667*5EPm1          | 1  | q^4   | 25 | S5&5 |
| 737 | 0.50000*5GAm1           | 1  | q^2   | 25 | S5&5 |
| 738 | 0.041667*1EPm4          | 4  | q^4   | 25 | S1&1 |
| 739 | 0.50000*1GAm4           | 4  | q^2   | 25 | S1&1 |
| 740 | 0.041667*2EPm4          | 4  | q^4   | 25 | S2&2 |
| 741 | 0.50000*2GAm4           | 4  | q^2   | 25 | S2&2 |
| 742 | 0.041667*3EPm4          | 4  | q^4   | 25 | S3&3 |
| 743 | 0.50000*3GAm4           | 4  | q^2   | 25 | S3&3 |
| 744 | 0.041667*4EPm4          | 4  | q^4   | 25 | S4&4 |
| 745 | 0.50000*4GAm4           | 4  | q^2   | 25 | S4&4 |
| 746 | 0.041667*5EPm4          | 4  | q^4   | 25 | S5&5 |
| 747 | 0.50000*5GAm4           | 4  | q^2   | 25 | S5&5 |
| 748 | 0.041667*1EPm22         | 22 | q^4   | 25 | S1&1 |
| 749 | 0.50000*1GAm22          | 22 | q^2   | 25 | S1&1 |
| 750 | 0.041667*2EPm22         | 22 | q^4   | 25 | S2&2 |
| 751 | 0.50000*2GAm22          | 22 | q^2   | 25 | S2&2 |
| 752 | 0.041667*3EPm22         | 22 | q^4   | 25 | S3&3 |
| 753 | 0.50000*3GAm22          | 22 | q^2   | 25 | S3&3 |
| 754 | 0.041667*4EPm22         | 22 | q^4   | 25 | S4&4 |
| 755 | 0.50000*4GAm22          | 22 | q^2   | 25 | S4&4 |
| 756 | 0.041667*5EPm22         | 22 | q^4   | 25 | S5&5 |
| 757 | 0.50000*5GAm22          | 22 | q^2   | 25 | S5&5 |
| 758 | END-HAMILTONIAN-SECTION |    |       |    |      |
| 759 |                         |    |       |    |      |
| 760 | END-OPERATOR            |    |       |    |      |

## References

- [1] G. A. Worth, K. Giri, G. W. Richings, I. Burghardt, M. H. Beck, A. Jäckle, H.-D. Meyer, The QUANTICS Package, A Suite of Programs for Molecular Quantum Dynamics Simulations, Version 1.1, **2015**.
- [2] G. A. Worth, Quantics: A General Purpose Package for Quantum Molecular Dynamics Simulations, *Comput. Phys. Commun.* **2020**, *248*, 107040.
- [3] C. J. Seliskar, S. P. McGlynn, Electronic Spectroscopy of Maleimide and Its Isoelectronic Molecules. I. Maleimide and N-Alkylmaleimides, *J. Chem. Phys.* **1971**, *55*, 4337–4342.
